# Supplementary material for: Determination of Chloramphenicol in Honey Using Salting-Out Assisted Liquid-Liquid Extraction Coupled with Liquid Chromatography-Tandem Mass Spectrometry and Validation According to 2002/657 European Commission Decision
Source: PubMed Central journal article supplement (PMC7435715; doi:10.3390/molecules25153481), 2020-07-31
Supplement: molecules-25-03481-s001.pdf [file molecules-25-03481-s001.pdf]

**Supplementary Materials for  
Determination of Chloramphenicol in Honey Using Salting-Out Assisted  
Liquid–Liquid Extraction Coupled with Liquid Chromatography–Tandem  
Mass Spectrometry and Validation According To 2002/657/EC Decision**

**Table S1.** Design matrix for the 2<sup>4</sup>-Factorial design and obtained result for each run.

| Independent variables |     |           |           |    |           | Dependent variables |         |          |
|-----------------------|-----|-----------|-----------|----|-----------|---------------------|---------|----------|
| Block                 | Run | HDV<br>mL | ACN<br>mL | pH | NaCl<br>% | SV<br>mL            | ER<br>% | nME<br>% |
| 1                     | 1   | 3         | 2         | 12 | 25        | 1.4                 | 96      | 23       |
| 1                     | 2   | 5         | 2         | 12 | 25        | 0.8                 | 94      | 11       |
| 1                     | 3   | 5         | 4         | 12 | 25        | 3.1                 | 94      | 16       |
| 1                     | 4   | 5         | 2         | 12 | 15        | 0.3                 | 65      | 0        |
| 1                     | 5   | 3         | 4         | 12 | 15        | 3.5                 | 72      | 25       |
| 1                     | 6   | 3         | 4         | 2  | 25        | 3.6                 | 91      | 63       |
| 1                     | 7   | 4         | 3         | 7  | 20        | 2.1                 | 89      | 60       |
| 1                     | 8   | 4         | 3         | 7  | 20        | 2.1                 | 88      | 69       |
| 1                     | 9   | 3         | 4         | 12 | 25        | 3.6                 | 105     | 36       |
| 1                     | 10  | 3         | 4         | 2  | 15        | 3.5                 | 83      | 65       |
| 1                     | 11  | 5         | 4         | 2  | 15        | 2.9                 | 81      | 67       |
| 1                     | 12  | 3         | 2         | 2  | 25        | 1.4                 | 92      | 65       |
| 1                     | 13  | 5         | 2         | 2  | 25        | 0.9                 | 100     | 63       |
| 1                     | 14  | 3         | 2         | 12 | 15        | 1.2                 | 80      | 11       |
| 1                     | 15  | 5         | 4         | 12 | 15        | 2.8                 | 70      | 12       |
| 1                     | 16  | 5         | 4         | 2  | 25        | 3.1                 | 97      | 62       |
| 1                     | 17  | 5         | 2         | 2  | 15        | 0.3                 | 69      | 38       |
| 1                     | 18  | 3         | 2         | 2  | 15        | 1.2                 | 82      | 64       |

(HDV) Honey diluted volume, (ACN) extraction solvent volume, pH, and NaCl percentage of honey diluted solution

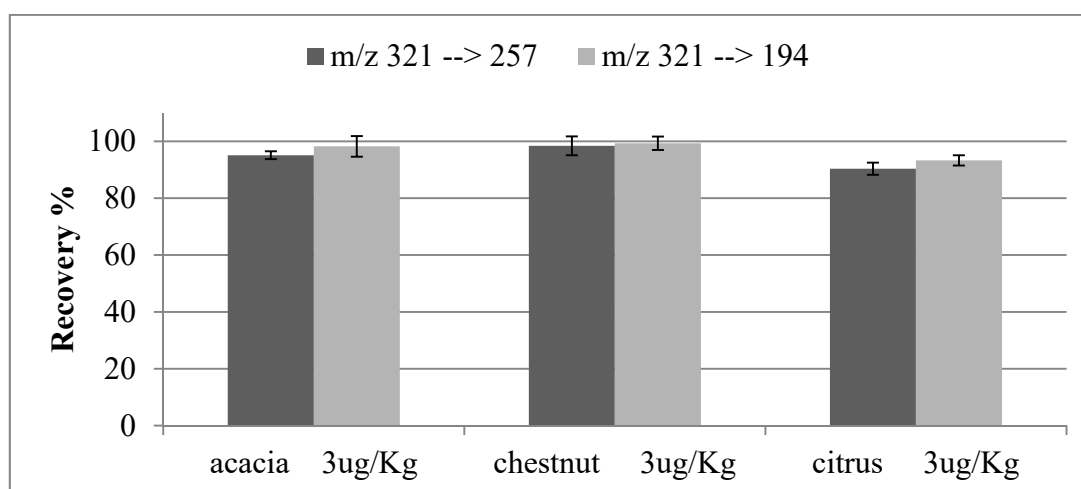

**Figure S1.** Evaluation of preliminary extraction recoveries on three different botanical honey under optimized experimental design conditions.

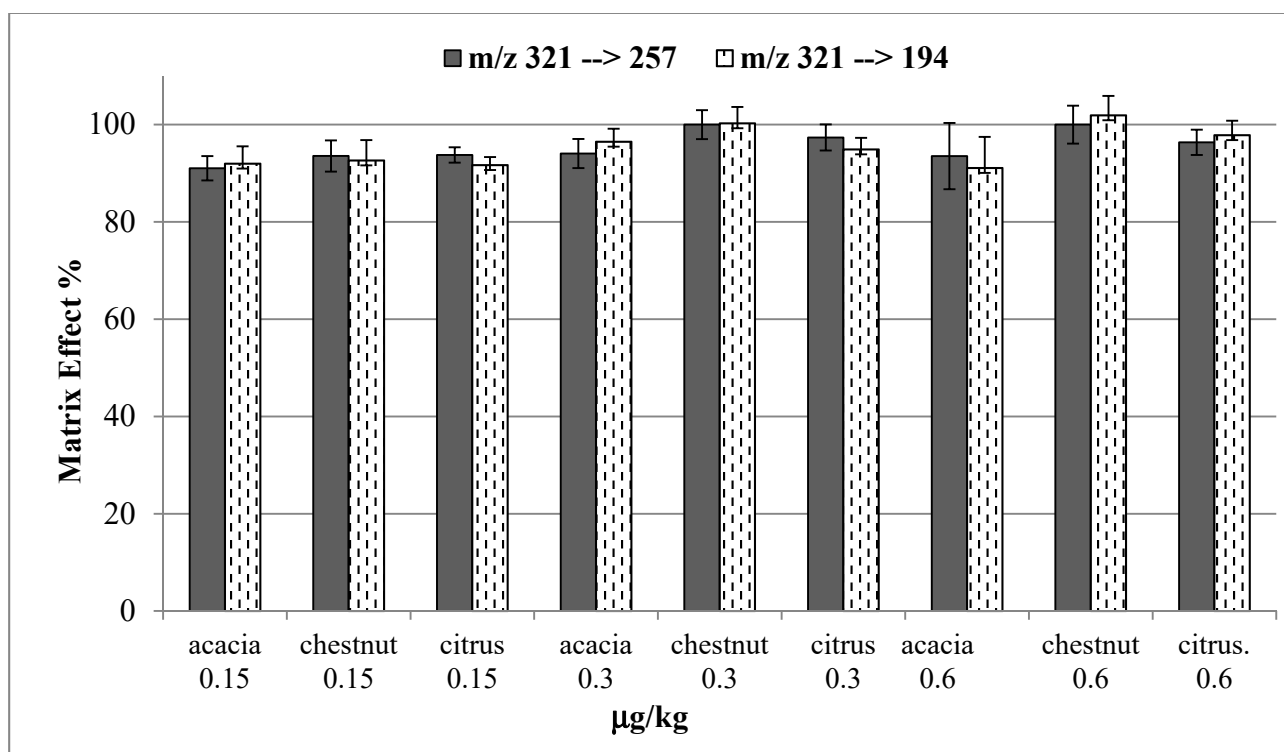

**Figure S2.** Evaluation of preliminary matrix effects on three different botanical honey at three concentration levels under optimized experimental design conditions.

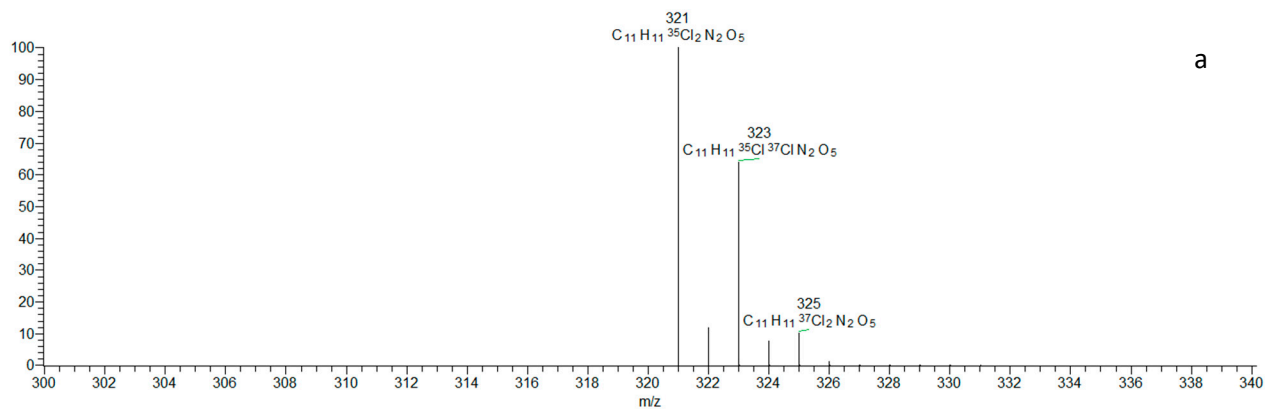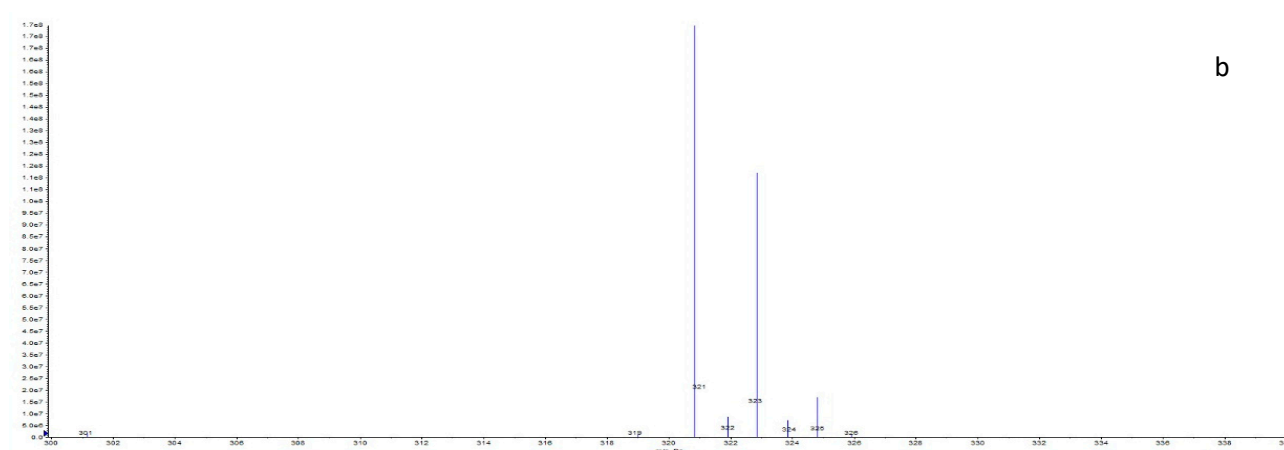

**Figure S3.** Theoretical (a) and experimental (b) isotopic pattern of CAP in negative ion mode.
